# Supplementary material for: Integration of organic and inorganic photothermal probes for enhanced photothermometric sensing of silver ions
Source: Royal Society of Chemistry journal article supplement (doi:10.1039/d1cc03576b), 2021-01-01
Supplement: d1cc03576b1.pdf [file d1cc03576b1.pdf]

## Supporting Information

### Integration of organic and inorganic photothermal probes for enhanced photothermometric sensing silver ions

Huiyi Huang,<sup>a,b</sup> Honghong Rao,<sup>\*b</sup> Xinyuan Zhang,<sup>a,b</sup> Rongji Wang,<sup>a</sup> Mingming Wei,<sup>a</sup> Xin Xue,<sup>a</sup> Mingyue Luo,<sup>a</sup> Zhonghua Xue<sup>\*a</sup>, Xiaoquan Lu<sup>a</sup>

<sup>a</sup> Key Laboratory of Bioelectrochemistry & Environmental Analysis of Gansu Province, College of Chemistry & Chemical Engineering, Northwest Normal University, Lanzhou, 730070 (China)

<sup>b</sup> School of Chemistry & Chemical Engineering, Lanzhou City University, Lanzhou, 730070 (China)

\*E-mail address: rhh@nwnu.edu.cn (H. H. Rao); xzh@nwnu.edu.cn (Z. H. Xue).

### Experimental Section

**Chemicals and Materials.** Citric acid ( $\geq 99.5\%$ ), iron (III) chloride ( $\text{FeCl}_3$ ,  $\geq 98\%$ ), potassium ferrocyanide trihydrate ( $\text{K}_4\text{Fe}(\text{CN})_6 \cdot 3\text{H}_2\text{O}$ ,  $\geq 99.5\%$ ), phosphoric acid ( $\text{H}_3\text{PO}_4$ ,  $\geq 85.0\%$ ), boric acid ( $\text{H}_3\text{BO}_3$ ,  $\geq 99.5\%$ ), acetic acid ( $\text{HAc}$ ,  $\geq 99.5\%$ ), silver nitrate ( $\text{AgNO}_3$ ,  $\geq 99.8\%$ ) and 3,3',5,5'-tetramethylbenzidine (TMB, 98%) were all obtained from Aladdin Chemistry Co., Ltd. (Shanghai, China). Hydrogen peroxide ( $\text{H}_2\text{O}_2$ , 30%) was obtained from Beijing Chemical Corporation (Beijing, China). Superoxide dismutase (SOD) from baker's yeast (*S. cerevisiae*) was purchased from Sigma-Aldrich Company (Shanghai, China). Sodium hydroxide ( $\text{NaOH}$ ,  $\geq 96\%$ ), absolute ethyl alcohol ( $\geq 99.7\%$ ), tertiary butanol (t-BuOH), sodium bicarbonate ( $\text{NaHCO}_3$ ), sodium azide ( $\text{NaN}_3$ ) and other metal salts ( $\text{AgNO}_3$ ,  $\text{Cr}(\text{NO}_3)_3$ ,  $\text{Cd}(\text{NO}_3)_2$ ,  $\text{Ce}(\text{NO}_3)_2$ ,  $\text{Fe}(\text{NO}_3)_2$ ,  $\text{Fe}(\text{NO}_3)_3$ ,  $\text{KNO}_3$ ,  $\text{Mg}(\text{NO}_3)_2$ ,  $\text{NaNO}_3$ ,  $\text{Cu}(\text{NO}_3)_2$ ,  $\text{Ni}(\text{NO}_3)_2$ ,  $\text{Pb}(\text{NO}_3)_2$ ,  $\text{Bi}(\text{NO}_3)_3$ ,  $\text{Co}(\text{NO}_3)_2$ ,  $\text{Zn}(\text{NO}_3)_2$ ,  $\text{NH}_4\text{NO}_3$  and  $\text{Hg}(\text{NO}_3)_2$ ) were purchased from Sinopharm Chemical Reagent (Shanghai, China). The  $\text{Ag}^+$  standard solution was purchased from Guobiao (Beijing) Testing & Certification Co. Ltd. All other reagents and chemicals were of at least analytical grade. All aqueous solutions were prepared using deionized (DI) water with a resistivity of  $18.24 \text{ M}\Omega \cdot \text{cm}$ . Tap-water samples were collected from the water pipe in our laboratory and Yellow River samples were collected from the local water supply.

**Instruments.** UV-vis spectra were recorded on a T6 new century spectrophotometer (China). Transmission electron microscopy (TEM) images were obtained on an FEI Tecnai F20 (200 kV) instrument equipped with an Energy dispersive X-ray spectroscopy (EDS). X-ray photo-electron spectroscopy (XPS) was performed by using an ESCALAB 250Xi (Thermo Fisher Scientific, USA). FT-IR spectra were obtained using a Broker Optics FTS3000 spectrometer (DIGI-LAB, USA) in the range of  $400\text{-}4000 \text{ cm}^{-1}$ . Raman spectra were determined by a con focal Raman microscope (Lab RAM HR Evolution, France HORIBA Jobin Yvon S.A.S.). High speed centrifuge (Ke Cheng H3-18K, China) was used for cleaning PB NCs materials. The acidity of the buffer solution was monitored by a Metrohm 632 pH-meter (PHS-3C, China). Homemade constant warm water bath was employed for incubating reaction system. A 2 mL capacity cuvette with a 1cm path length was used for measuring the absorbance, and a diode laser (MDL-H-808-5W-17120005) with output power from 0 to 5W was purchased from Changchun New Industries Optoelectronics Technology Co. Ltd. A pen-style digital thermometer (MITIR-TP677) with a detection range of  $-50 \text{ }^\circ\text{C}$  to  $+300 \text{ }^\circ\text{C}$  was obtained from a local supermarket. The concentration of  $\text{Ag}^+$  in real samples was measured through an ICP-MS spectrometer (NexION 350D, PerkinElmer,

US). The 96-well plates were purchased from Greiner Bio-One. All photographs were taken with a Canon camera (EOS-70D).

**Preparation of PB NCs.** The PB NCs were synthesized according to recently reported procedure with minor modifications.<sup>1</sup> Briefly, in a standard synthesis, 250 mL of an aqueous solution containing 1 mM  $K_4[Fe(CN)_6]$  and 0.5 mM citric acid was firstly prepared under vigorous stirring at 60 °C. Then, a 250 mL mixture of 1 mM  $FeCl_3$  and 0.5 mM citric acid was added dropwise to the above solution with a constant voltage funnel under stirring at 60 °C. During the reaction process, a color change from yellow, apple-green, and finally to deep blue was observed. After cooling down to room temperature, a constant stirring of the deep blue solution was maintained at room temperature for another 30 min. Finally, the mixture solution was further centrifuged at 10000 rpm for 1 h to obtain PB NCs precipitation. After being washed with ultrapure water for three times, and redispersed in ultrapure water at a concentration of 0.5 mM to obtain PB NCs solution.

**Condition Optimization:** To gain an excellent photothermometric sensing performance of  $Ag^+$ , experiment conditions containing incubation pH and time between  $Ag^+$  and PB NCs, reaction pH and time of the catalytic system, contents of PB NCs, TMB,  $H_2O_2$  were optimized by using Vis-NIR spectra, respectively. For the optimization of the power and irradiation time of 808 laser, the temperature was recorded using a portable pen-style digital thermometer upon the continuous laser irradiation from 30 s and up to 240 s. The position of the thermometer was fixed in all temperature measurements to avoid temperature variations from position to position. And a small magnet in the cuvette was always stirred at a speed of 800 rpm during the whole irradiation experiment process to avoid detection errors caused by local temperature changes in the temperature test.

**Colorimetric and photothermometric sensing of  $Ag^+$  based on the single-signal transduction channel.** For the single-signal colorimetric sensing system without TMB, standard procedure for  $Ag^+$  assay was carried out as follows: first of all, 10  $\mu$ L of  $Ag^+$  with different concentrations (final concentration: 0, 0.3, 0.6, 1, 2, 3, 4, 5, 6, 7, 8, 9 and 10  $\mu$ M) was respectively incubated with 50  $\mu$ L of 0.5 mM PB NCs in a disposable cuvette containing 1940  $\mu$ L of 0.2 M Britton-Robinson (BR) buffer ( pH 7.5 ) at 50 °C for 10 min, after cooling to room temperature, the UV-vis spectra and photographs were taken. The same experimental procedure was performed for photothermometric sensing of  $Ag^+$ , to measure the uniform temperature of the solution, a small magnet in the cuvette was always stirred at a speed of 800 rpm during the irradiation experiment process. After the above reaction system was irradiated under a 808 nm NIR laser for 120 s, the temperature increase was immediately recorded using a portable pen-style digital thermometer.  $\Delta T$  ( $\Delta T = T - T_0$ ) was taken as the photothermal signal for each sample, T and  $T_0$  were defined as the temperatures of reaction solution with different  $Ag^+$  concentrations after and before 120 s laser irradiation, respectively. For the single-signal colorimetric sensing system with TMB, the typical  $Ag^+$  analysis was performed as follows: firstly, 10  $\mu$ L of  $Ag^+$  with different contents (final concentration: 0, 0.3, 0.6, 1, 2, 4, 6, 8, 12, 16, 20, 24 and 28  $\mu$ M) was respectively mixed with 50  $\mu$ L of 0.5 mM PB NCs solution in a disposable cuvette containing 240  $\mu$ L of 0.2 M BR buffer ( pH 7.5 ), and the mixture was incubated at 50 °C for 10 min. Then, 1400  $\mu$ L of 0.2 M BR buffer ( pH 4.0 ) with 200  $\mu$ L of 10 mM  $H_2O_2$  and 100  $\mu$ L of 10 mM TMB was added into the above mixture. Subsequently, after the reaction solution was incubated for 10 min at room temperature, its UV-vis spectra and photographs were taken.

### **Enhanced photothermometric sensing of Ag<sup>+</sup> based on the dual-signal transduction channel.**

For photothermometric assay, the above reaction solution of the single-signal colorimetric sensing system with TMB was irradiated horizontally upon a 808 nm NIR laser for 120 s at the power of 4 W. Meanwhile, a pen-style digital thermometer was used to record the temperature increase of the above solution along with a small magnet in the cuvette was always stirred at a speed of 800 rpm during the whole irradiation process.  $\Delta T$  ( $\Delta T = T - T_0$ ) was taken as the photothermal signal for each sample, T and  $T_0$  were defined as the temperatures of reaction solution after and before 120 s laser irradiation, respectively.

**Specificity of the Sensing System.** The specificity of the explored enhanced photothermal sensing system toward other common cations including Hg<sup>2+</sup>, NH<sub>4</sub><sup>+</sup>, Fe<sup>3+</sup>, Ce<sup>2+</sup>, Pb<sup>2+</sup>, Ni<sup>2+</sup>, Mg<sup>2+</sup>, K<sup>+</sup>, Bi<sup>3+</sup>, Na<sup>+</sup>, Cu<sup>2+</sup>, Zn<sup>2+</sup>, Co<sup>2+</sup>, Cd<sup>2+</sup>, Cr<sup>3+</sup> and Fe<sup>2+</sup> under the optimal conditions was also investigated, the concentrations of all interfering ions were 20-fold higher than that of silver ions (16  $\mu$ M).

**Detection of Ag<sup>+</sup> in Real Water Samples.** For the detection of Ag<sup>+</sup> in real water samples, the Yellow River water samples from three different local water supplies and the tap water sample from the water pipe in our laboratory were filtered three times with a 0.45  $\mu$ m microfiltration membrane without further pretreatment. Subsequently, the above samples spiked with 1, 5 or 10  $\mu$ M Ag<sup>+</sup> and 240  $\mu$ L of 0.2 M BR buffer solution (pH 7.5) containing PB NCs (50  $\mu$ L) were incubated at 50 °C for 10 min, then 1700  $\mu$ L of 0.2 M BR buffer solution (pH 4.0) containing H<sub>2</sub>O<sub>2</sub> (200  $\mu$ L) and TMB (100  $\mu$ L) was added into the above solution and left to react for another 10 min. Finally, the spiked samples were analyzed by the proposed enhanced photothermometric method and ICP-MS.

**Optimization of the experimental conditions.** To investigate the sensing performance of the proposed enhanced photothermometric assay for Ag<sup>+</sup>, the solution color, Vis-NIR spectra, and PTEs of the reaction systems with different experimental concentrations were studied in detail. Some factors influencing the sensing performance were firstly evaluated, such as incubation pH and time between Ag<sup>+</sup> and PB NCs, reaction pH and time of the catalytic system, contents of PB NCs, TMB, H<sub>2</sub>O<sub>2</sub>. The maximum increment of absorbance ( $A_0 - A$ ) shown in Fig. S5 and S6 that could represent TMB indicator was chosen as the criterion to optimize above factors, in which  $A_0$  and A are the absorbance at 653 nm of the reaction system in the absence and presence of Ag<sup>+</sup>. The optimal conditions for Ag<sup>+</sup> detection were found to be (i) a pH value of 7.5 and a time of 10 min for the incubation of Ag<sup>+</sup> with PB NCs, (ii) a pH value of 4.0 and a time of 10 min for the catalytic reaction, (iii) 12.5  $\mu$ M PB NCs, 0.5 mM TMB, and 1 mM H<sub>2</sub>O<sub>2</sub>. With this optimized condition, a sensitive Ag<sup>+</sup> content-dependent color change was successfully observed. For the optimal power and irradiation time of 808 laser, as displayed in Fig. S7A, the temperature increase of the reaction system at different irradiation powers of 808 laser indicated that 4 W is practicable. Moreover, under the irradiation power of 4 W, the system temperature increased dramatically with the increasing PB NCs contents at different irradiation times. As clearly, the temperature increase at 120 s displays the best linear relationship with PB NCs contents in the range of 5~12.5  $\mu$ M (Fig. S7B), which is more useful for fabricating thermometer readout-based quantitative strategy. Thus, 120 s was used as an optimal irradiation time to obtain a sensitive temperature change in the subsequent Ag<sup>+</sup> analysis.

**Feasibility of the enhanced photothermometric sensing of Ag<sup>+</sup> based on the dual-signal transduction channel.** To further investigate the sensing performance of the dual-signal

transduction channel for enhanced photothermometric assay of  $\text{Ag}^+$ , the UV-vis spectra and photothermal testing of different components were studied in detail. As shown in Fig. S8A, in the absence of  $\text{Ag}^+$ , PB NCs solution exhibited a maximum absorbance at 712 nm with a distinguishable blue color (12.5  $\mu\text{M}$ , curve a). After addition of 16  $\mu\text{M}$   $\text{Ag}^+$ , the intensities of the blue color and absorbance of PB NCs system decreased significantly (curve c) ascribed to the effective conversion of PB NCs to  $\text{Ag}_4[\text{Fe}(\text{CN})_6]$  nanoparticles (AgFC NPs). Interestingly, with the introduction of TMB, the mixture of PB NCs and TMB- $\text{H}_2\text{O}_2$  solution yielded a deep-blue with distinct characteristic peaks of oxTMB at 653 nm and 890 nm (curve d) attributed to the high peroxidase-like activity of PB NCs. However, with the increase of  $\text{Ag}^+$  contents (0.3, 4, 16  $\mu\text{M}$ ), the PB NCs-TMB- $\text{H}_2\text{O}_2$  system showed a gradual fading tendency from blue to light blue and then to nearly colorless along with the changes of UV-vis absorbance with the same trend (curve f, g, e). Furthermore, the corresponding temperature changes of the above colorimetric system were displayed in Fig. S8B. PB NCs solution with the good photothermal effect shows an obvious temperature increase (histogram a) after 120 s irradiation at 808 nm laser. Remarkably, a significant temperature decrease was observed after 16  $\mu\text{M}$  of  $\text{Ag}^+$  addition (histogram c) close to that of the TMB- $\text{H}_2\text{O}_2$  solution (histogram b). More significantly, a distinct temperature decrease for the dark-blue PB NCs-TMB- $\text{H}_2\text{O}_2$  system (histogram d) after the increasing concentration of  $\text{Ag}^+$  addition (histogram f, g, e) was observed. All these results indicated that target  $\text{Ag}^+$  could not only directly induce PB-to-AgFC conversion to suppress the photothermal response, but also markedly inhibit the peroxidase-like activity of PB NCs to hinder the photothermal response of oxTMB catalyzed by PB NCs nanozyme, and demonstrated the capability of the proposed dual-signal transduction channel for photothermometric sensing  $\text{Ag}^+$ .

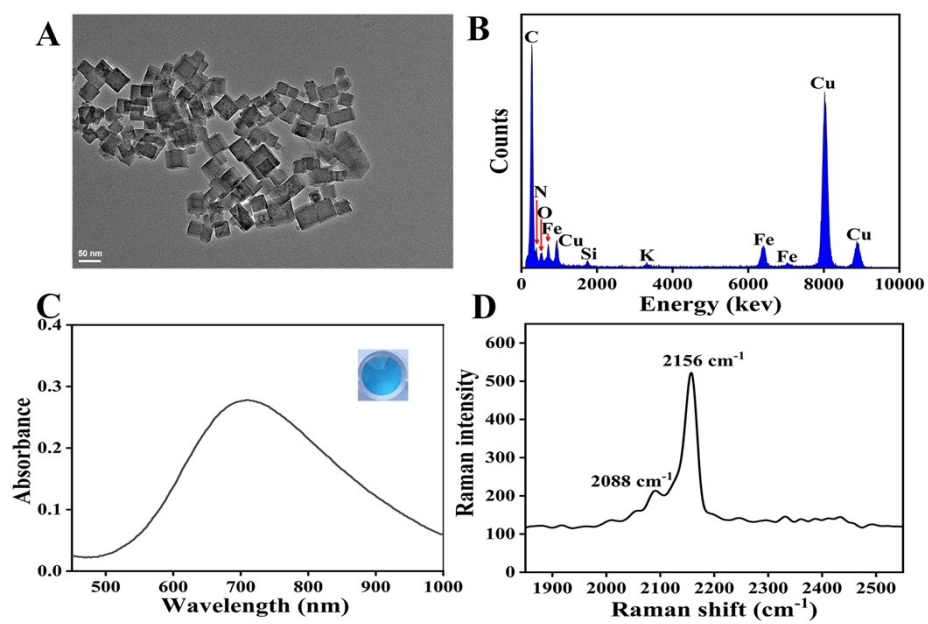

Fig. S1. Characterization of the prepared PB NCs. (A) TEM image. (B) EDS spectrum. (C) UV-vis absorption spectrum and the photo of the solution (inset). (D) Raman spectrum.

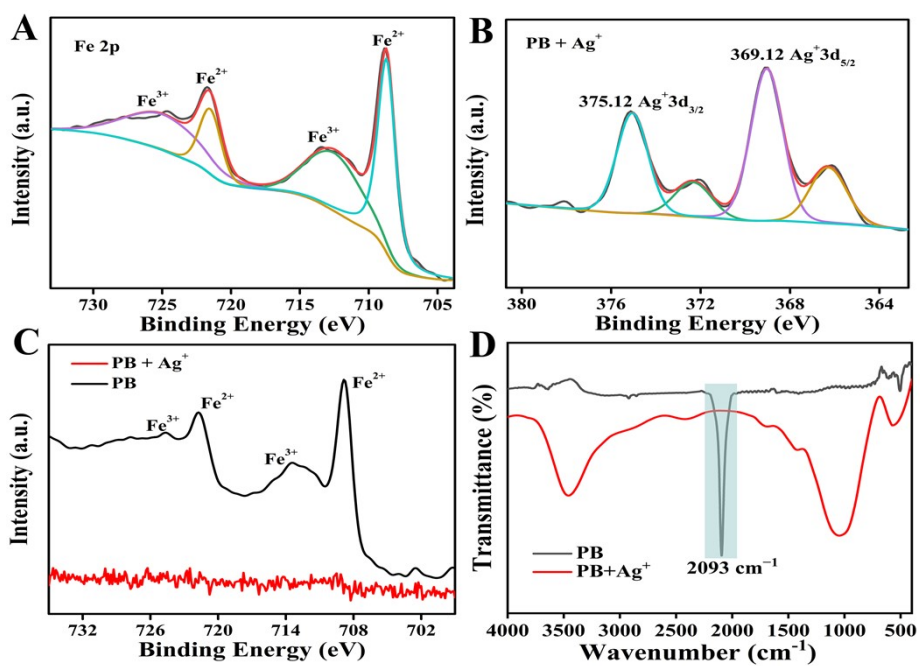

Fig. S2. XPS and FT-IR spectra of the PB NCs before and after incubation with Ag<sup>+</sup>. (A) Fe 2P XPS spectrum of the PB NCs. (B) Ag 3d XPS spectrum of the PB NCs after incubation with Ag<sup>+</sup>. (C) XPS survey spectra of both samples. (D) FT-IR spectra of both samples.

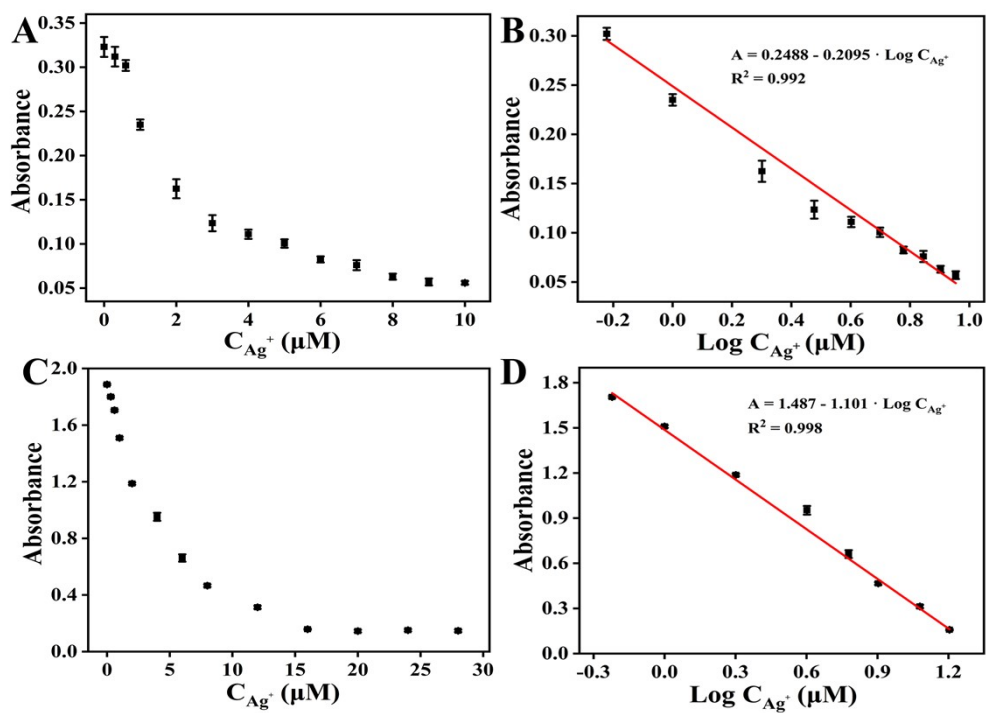

Fig. S3. Absorbance responses of (A) the single-signal colorimetric sensing system without TMB at 712 nm ( $A_{712}$ ) and (C) with TMB at 653 nm ( $A_{653}$ ) versus the different  $Ag^+$  concentrations. The linear relationship between (B)  $A_{712}$  and (D)  $A_{653}$  with the logarithm of  $Ag^+$  concentrations. Error bars indicate standard deviations (n = 3).

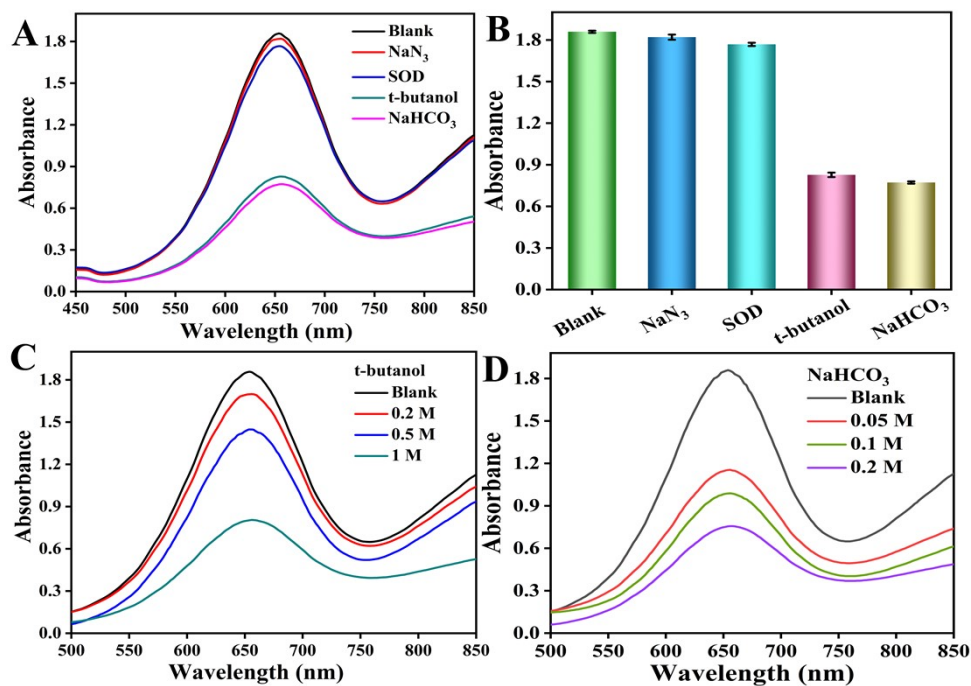

Fig. S4. UV-vis absorption spectra and the corresponding histograms of the catalytic system in the presence of different free-radical scavengers.



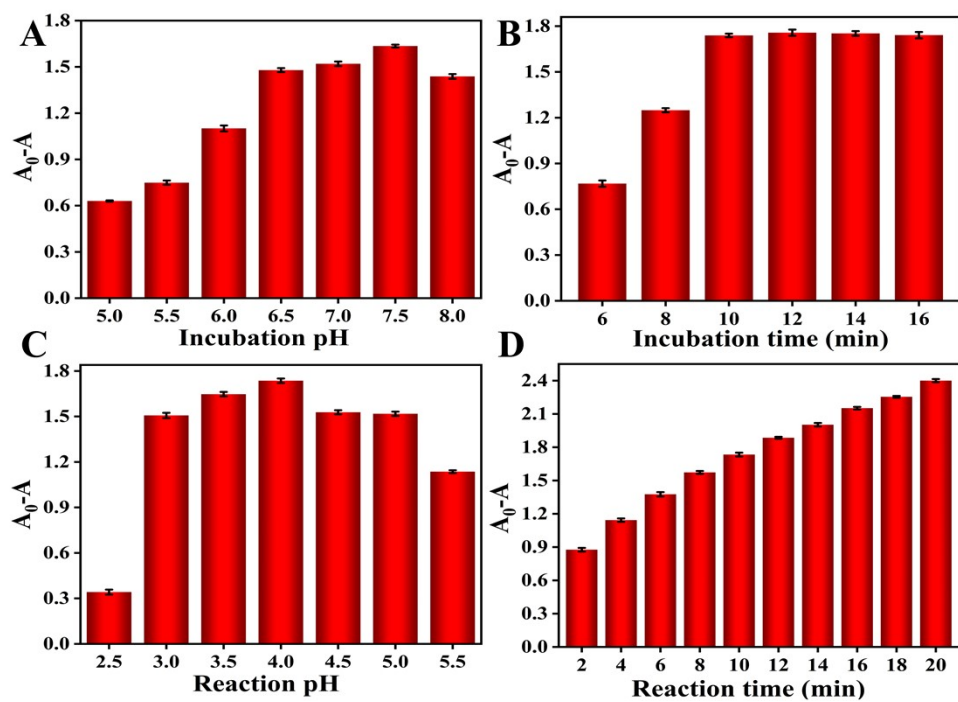

Fig. S5. The effects of different pH and time conditions to the proposed enhanced photothermometric system. (A) Incubation pH and (B) time between  $\text{Ag}^+$  and PB NCs. (C) Reaction pH and (D) time of the catalytic system.

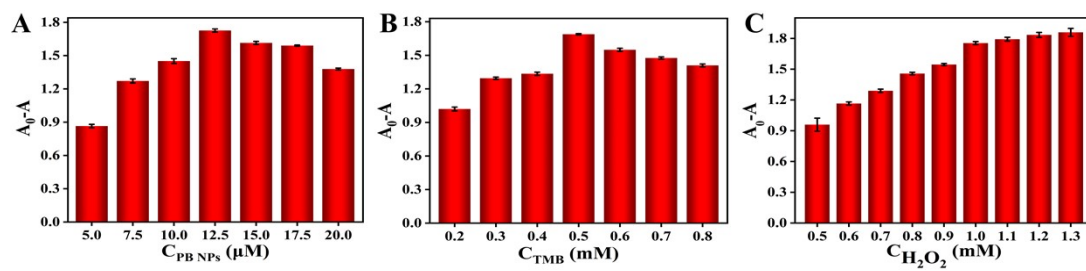

Fig. S6. The effects of different chemicals concentrations to the proposed enhanced photothermometric system. (A) PB NCs. (B) TMB. (C)  $H_2O_2$ .

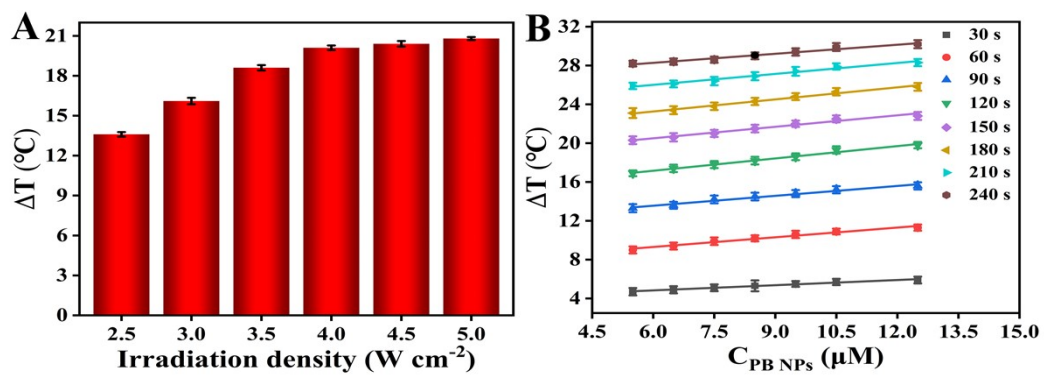

Fig. S7. The effects of different irradiation conditions to the proposed enhanced photothermometric system. (A) Irradiation density. (B) Irradiation time.

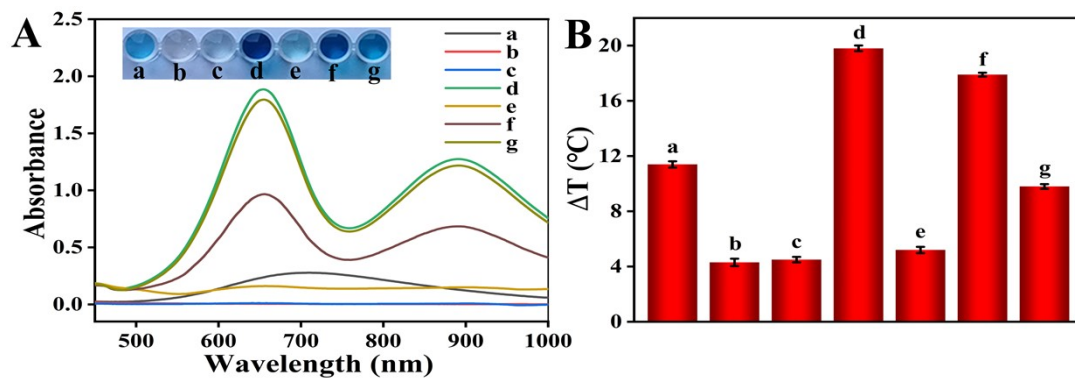

Fig. S8. (A) UV-vis spectra and (B) temperature increase of different components (Insert: corresponding solution color). (a-g: PB NCs; TMB-H<sub>2</sub>O<sub>2</sub>; 16 μM AgNO<sub>3</sub> + PB NCs; PB NCs + TMB-H<sub>2</sub>O<sub>2</sub>; 16 μM AgNO<sub>3</sub> + PB NCs + TMB-H<sub>2</sub>O<sub>2</sub>; 0.3 μM AgNO<sub>3</sub> + PB NCs + TMB-H<sub>2</sub>O<sub>2</sub>; 4 μM AgNO<sub>3</sub> + PB NCs + TMB-H<sub>2</sub>O<sub>2</sub>)

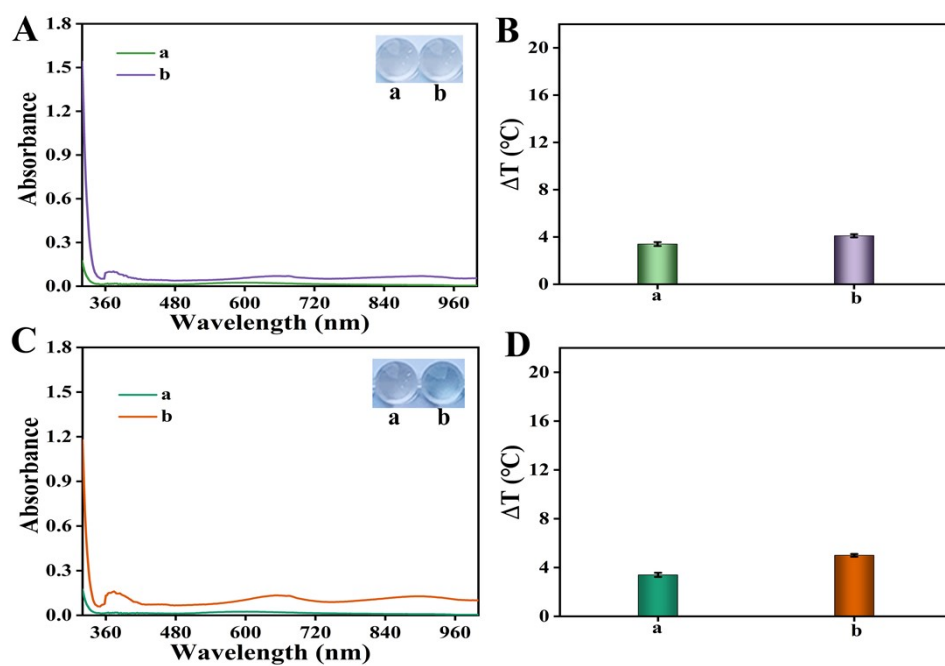

Fig. S9. UV-vis spectra and temperature increase of different reaction solutions (A and B: (a)  $10 \mu\text{M Fe}^{3+}$ , insert of photographs; (b)  $10 \mu\text{M Fe}^{3+} + 0.5 \text{ mM TMB} + 1 \text{ mM H}_2\text{O}_2$ ); (C and D: (a)  $10 \mu\text{M Ag}^{+}$ , insert of photographs; (b)  $10 \mu\text{M Ag}^{+} + 0.5 \text{ mM TMB} + 1 \text{ mM H}_2\text{O}_2$ ).

Table S1. Comparison of the sensing performance of different Ag<sup>+</sup> assays.

| Detection Methods             | Detection Probes                         | Linear Range   | LOD           | Ref.      |
|-------------------------------|------------------------------------------|----------------|---------------|-----------|
| Colorimetric                  | BSA-stabilized Au clusters               | 0.5-10 $\mu$ M | 0.204 $\mu$ M | [2]       |
| Colorimetric                  | Pyridine labeled Au NPs                  | -              | 1 mM          | [3]       |
| Photothermometric             | Hydroquinone and Au NPs                  | 1-170 $\mu$ M  | 1 $\mu$ M     | [4]       |
| Colorimetric                  | Tween 20 labeled Au NPs                  | 0.4-1 $\mu$ M  | 0.1 $\mu$ M   | [5]       |
| Fluorometric                  | Metal-organic framework                  | 0-500 $\mu$ M  | 0.09 $\mu$ M  | [6]       |
| Paper-based<br>Colorimetric   | PB NPs                                   | -              | 0.9 $\mu$ M   | [7]       |
| Paper-based<br>Colorimetric   | Specifically responsive indicators       | -              | 1.69 $\mu$ M  | [8]       |
| Colorimetric                  | Au NPs                                   | 2-28 $\mu$ M   | 0.85 $\mu$ M  | [9]       |
| Photothermal<br>Microfluidic  | PB NPs                                   | -              | 0.25 $\mu$ M  | [10]      |
| Enhanced<br>Photothermometric | PB NCs<br>3,3',5,5'-tetramethylbenzidine | 0.3-20 $\mu$ M | 0.13 $\mu$ M  | This work |

Table S2. Determination of Ag<sup>+</sup> in Real Water Samples based on spike method.

| <b>samples</b>             | <b>spiked<br/>(<math>\mu\text{M}</math>)</b> | <b>ICP-MS<br/>(<math>\mu\text{M}</math>)</b> | <b>RSD<br/>(%)</b> | <b>Enhanced<br/>Photothermometric<br/>sensing (<math>\mu\text{M}</math>)</b> | <b>RSD<br/>(%)</b> | <b>recovery<br/>(%)</b> |
|----------------------------|----------------------------------------------|----------------------------------------------|--------------------|------------------------------------------------------------------------------|--------------------|-------------------------|
| Yellow<br>River<br>water 1 | 0                                            | 0.02                                         | 1.4                | ND                                                                           |                    |                         |
|                            | 1                                            | 1.05                                         | 1.7                | 1.06                                                                         | 2.2                | 104                     |
|                            | 5                                            | 5.02                                         | 2.0                | 4.99                                                                         | 2.9                | 99.4                    |
|                            | 10                                           | 10.02                                        | 2.3                | 9.93                                                                         | 3.0                | 99.1                    |
| Yellow<br>River<br>water 2 | 0                                            | ND                                           |                    | ND                                                                           |                    |                         |
|                            | 1                                            | 1.02                                         | 1.7                | 1.03                                                                         | 2.5                | 103                     |
|                            | 5                                            | 4.98                                         | 2.1                | 4.95                                                                         | 2.8                | 99                      |
|                            | 10                                           | 10.05                                        | 2.5                | 10.01                                                                        | 2.9                | 100.1                   |
| Yellow<br>River<br>water 3 | 0                                            | 0.04                                         | 1.1                | ND                                                                           |                    |                         |
|                            | 1                                            | 1.06                                         | 2.1                | 1.02                                                                         | 2.0                | 98                      |
|                            | 5                                            | 5.06                                         | 2.0                | 5.04                                                                         | 3.2                | 100                     |
|                            | 10                                           | 10.02                                        | 1.8                | 10.06                                                                        | 4.1                | 100.2                   |
| Tap<br>water               | 0                                            | 0.03                                         | 1.5                | ND                                                                           |                    |                         |
|                            | 1                                            | 1.04                                         | 2.0                | 1.05                                                                         | 2.2                | 102                     |
|                            | 5                                            | 5.03                                         | 2.6                | 4.95                                                                         | 3.2                | 98.4                    |
|                            | 10                                           | 10.07                                        | 2.3                | 9.93                                                                         | 3.7                | 99                      |

Note: Recovery (%) =  $[(C_{\text{found}} - C_{\text{blank}})/C_{\text{Added}}] \times 100\%$ .

RSD (%) =  $(\text{SD}/\text{mean}) \times 100\%$

## References

1. W. Huang, Y. Liang, Y. Deng, Y. Cai and Y. He, *Microchim. Acta*, 2017, **184**, 2959-2964.
2. Y. Chang, Z. Zhang, J. Hao, W. Yang and J. Tang, *Sens. Actuators B Chem.*, 2016, **232**, 692-697.
3. A. Alizadeh, M. M. Khodaei, Z. Hamidi and M. b. Shamsuddin, *Sens. Actuators B Chem.*, 2014, **190**, 782-791.
4. B. Liu, H. Tan and Y. Chen, *Microchim. Acta*, 2013, **180**, 331-339.
5. C.-Y. Lin, C.-J. Yu, Y.-H. Lin and W.-L. Tseng, *Anal. Chem.*, 2010, **82**, 6830-6837.
6. J.-N. Hao and B. Yan, *J. Mater. Chem. A*, 2015, **3**, 4788-4792.
7. N. Bagheri, S. Cinti, E. Nobile, D. Moscone and F. Arduini, *Talanta*, 2021, **232**, 122474.
8. L. Liu and H. Lin, *Anal. Chem.*, 2014, **86**, 8829-8834.
9. A. Selva Sharma, T. SasiKumar and M. Ilanchelian, *J. Clust. Sci.*, 2018, **29**, 655-662.
10. G. Fu, Y. Zhu, K. Xu, W. Wang, R. Hou and X. Li, *Anal. Chem.*, 2019, **91**, 13290-13296.
